# Supplementary material
Source: PubMed Central journal article supplement (PMC7346283)
Supplement: NIHMS1581834-supplement-1.pdf [file NIHMS1581834-supplement-1.pdf]

**Appendix**  
**Primary Care Cluster RCT to Increase Diabetes Prevention Program Referrals**  
**Keck et al.**

**Appendix Table 1.** Proportion of Eligible Patients Screened for Diabetes and Documented to Have Prediabetes by Intervention Status and Control Clinic Location

| Variable                        | All         |       |                      |                   | FM control  |       |                      |                   | GIM control |       |                      |                    |
|---------------------------------|-------------|-------|----------------------|-------------------|-------------|-------|----------------------|-------------------|-------------|-------|----------------------|--------------------|
|                                 | Percentages |       | OR<br>(95% CI)       | <i>p</i> -value   | Percentages |       | OR<br>(95% CI)       | <i>p</i> -value   | Percentages |       | OR<br>(95% CI)       | <i>p</i> -value    |
|                                 | Con         | Int   |                      |                   | Con         | Int   |                      |                   | Con         | Int   |                      |                    |
| Diabetes screening <sup>a</sup> | 56.8%       | 65.5% | 1.45<br>(0.47, 4.49) | 0.42 <sup>b</sup> | 66.4%       | 66.3% | 0.97<br>(0.51, 1.86) | 0.90 <sup>c</sup> | 40.1%       | 65.7% | 2.86<br>(1.30, 6.27) | 0.029 <sup>d</sup> |
| Prediabetes documented          | 51.2%       | 57.4% | 1.29<br>(0.48, 3.47) | 0.52 <sup>e</sup> | 55.6%       | 57.5% | 1.08<br>(0.34, 3.42) | 0.84 <sup>f</sup> | 46.0%       | 57.3% | 1.58<br>(0.28, 8.74) | 0.37 <sup>g</sup>  |

<sup>a</sup>Percentage of eligible patients screened per USPSTF guidelines (age 40–70 years, BMI $\geq$ 25 kg/m<sup>2</sup>) with HbA1c performed in previous 3 years.

<sup>b</sup>7,300 observations were used in the analysis for diabetes screening at all locations.

<sup>c</sup>4,572 observations were used in the analysis restricted to the FM control clinic.

<sup>d</sup>5,263 observations were used in the analysis restricted to the GIM control clinic.

<sup>e</sup>2,231 observations were used in this analysis for documented prediabetes at all locations.

<sup>f</sup>1,502 observations were used in the analysis restricted to the FM control clinic.

<sup>g</sup>1,711 observations were used in the analysis restricted to the GIM control clinic.

Con, control; FM, Family Medicine clinic; GIM, General Internal Medicine clinic; Int, intervention.
